1 **Saliva as a testing sample for SARS-CoV-2**

2 **detection by RT-PCR in low prevalence**

3 **community settings**

4 Didzis Gavars<sup>1</sup>, Mikus Gavars<sup>1</sup>, Dmitry Perminov<sup>1,4</sup>, Janis Stasulans<sup>1</sup>,

5 Justine Stana<sup>1</sup>, Zane Metla<sup>1</sup>, Jana Pavare<sup>3</sup>, Eriks Tauckels<sup>1</sup>, Egils

6 Gulbis<sup>1</sup>, Uga Dumpis<sup>2,4</sup>

7 1 - E.Gulbja Laboratory, Riga, Latvia

8 2 - Pauls Stradins Clinical University Hospital, Riga Latvia

9 3 - Children's Clinical University Hospital, Riga Stradins University,  
10 Riga, Latvia

11 4 - University of Latvia, Riga, Latvia

12 **Corresponding author:**

13 Dr. Didzis Gavars, E.Gulbja Laboratory

14 Brivibas str.366, Riga, Latvia, LV-1006

15 email: [didzis@egl.lv](mailto:didzis@egl.lv);

16 telephone: +37129259742; fax: +37167543867

17 **Abstract**

18 **Objectives**

19 The number of COVID-19 cases is increasing globally and there is an  
20 urgency for a simple non-invasive method for the detection of SARS-  
21 CoV-2. Our study aimed to demonstrate that saliva can be used as a  
22 specimen for SARS-CoV-2 detection notably for the screening of  
23 extensive population groups via pooling.

24 **Methods**

25 To demonstrate that saliva is an appropriate specimen for SARS-CoV-  
26 2 detection a field study including 3,660 participants was performed  
27 between September 29 and October 1, 2020. We collected paired  
28 nasopharyngeal/oropharyngeal swabs (NPS) and saliva specimens and  
29 processed them within 24 hours of collection. We performed 36 serial  
30 measurements of 8 SARS-CoV-2 positive saliva samples to confirm  
31 the stability of the specimen and completed 37 pools of saliva samples  
32 by adding one positive specimen per pool.

33 **Results**

34 Saliva specimens were stable for testing for up to 24 hours. Overall,  
35 44 salival samples (1.2%) tested positive for SARS-CoV-2 during the  
36 field study. The results of saliva samples were consistent with those  
37 obtained from NPS from the same patient with 90% sensitivity (95%  
38 CI 68.3%-98.7%) and 100% specificity during the first two weeks after  
39 the onset of symptoms. Using pooling strategy 796 RT-PCR tests were  
40 performed. All pools showed 100% positivity in different pooling  
41 proportions.

42 **Conclusions**

43 Our findings demonstrate that saliva is an appropriate specimen for  
44 pooling and SARS-CoV-2 screening with accurate diagnostic  
45 performance. Patient-performed simple specimen collection allows  
46 testing an extensive number of people rapidly, obtaining results of the  
47 spread of SARS-CoV-2 and allowing authorities to take timely  
48 measures.

49

## 50 **Introduction**

51 Since the beginning of 2020 massive resources have been dedicated to  
52 control and mitigate the COVID-19 pandemic. Testing capacity and  
53 accessibility are crucial in monitoring COVID-19 outbreaks and  
54 allowing for the adjustment of measures put into place to reduce  
55 community transmission (1).

56 Viral nucleic acid detection using the real-time polymerase chain  
57 reaction (RT-PCR) assay remains the gold standard for the detection  
58 of SARS-CoV-2 and to diagnose COVID-19 (2). Due to the increased  
59 demand for sampling and testing materials globally considerable  
60 constraints remain to conduct widespread screening for SARS-CoV-2.  
61 It is especially challenging for counties with low prevalence levels as  
62 global suppliers allocate materials and decide delivery schedules based  
63 on the prevalence of the virus.

64 Shortages of supplies and medical staff, logistical hurdles, as well the  
65 unpleasantness associated with obtaining a RT-PCR specimen making  
66 it difficult to practice the procedure on children and causing irritation  
67 for those who need to undergo repeated tests, all these factors have  
68 naturally accelerated research into alternative specimens and sampling  
69 methods for COVID-19 testing (3,4).

70 On September 21, 2020, Latvia had a 14-day cumulative number of  
71 COVID-19 cases of 5.1 per 100,000 people. By October 10 that  
72 number had risen to 66. During this period, laboratories experienced a  
73 significant overload (5). Rapid and efficient solutions to increase  
74 testing capacity were needed.

75 The objective of this study was to confirm that saliva is a suitable  
76 specimen comparable to a nasopharyngeal/oropharyngeal swab for  
77 SARS-CoV-2 detection in specific populations. We also evaluated the  
78 pooling approach to employ it in field conditions for extensive  
79 screening of high-risk groups.

80

## 81 **Methods**

### 82 *Patient sample collection*

83 A single-center study was performed including all consented patients  
84 attending the laboratory for SARS-CoV-2 testing between May 12 and  
85 October 19, 2020. For the collection of the saliva samples, self-  
86 collection kits were distributed consisting of a specimen vial,  
87 registration form, alcohol pads for disinfection, and two safety plastic  
88 bags. Patients were requested to collect their saliva in an isolated  
89 location (keeping at least five meters distance from other persons or  
90 objects), preferably outdoors, at home, or in their car. The saliva was  
91 collected in a container without any additive and delivered to the  
92 laboratory within 24 hours. Paired nasopharyngeal/oropharyngeal  
93 swabs (NPS) for RT-PCR were collected using the standard method  
94 used in our laboratory (6).

### 95 *Sample preparation and analysis using RT-PCR*

96 Immediately upon arrival at the laboratory, the samples were  
97 pretreated by adding 1 ml of phosphate-buffered saline (PBS). The  
98 extraction of RNA and RT-PCR testing was identical for both swab  
99 and pre-treated saliva samples. Viral RNA was extracted with standard  
100 commercial extraction methods (QIAGEN, Germany and LifeRiver,  
101 China) used in our laboratory. RT-PCR was performed using our  
102 laboratory-developed and validated test method which detects S and N  
103 genes of the SARS-CoV-2 virus. Our validated and verified limit of  
104 detection (LOD) was 1 cp/rxn.

105

## 106 **Results**

### 107 *Stability of saliva specimens*

108 To confirm the stability of saliva samples, we performed 36 serial tests  
109 on 8 primary SARS-CoV-2 positive saliva samples collected from  
110 patients 48 hours after their NPS tested positive. The data are  
111 summarized in Tables 1-3. Testing was randomized by different time  
112 intervals, the time of day, and the shifts of technicians. It includes  
113 repeated testing of two samples after 22h (Table 2) and serial repeats  
114 of one sample (Table 3) with Ct value reporting.

115 All results confirmed a positive result after 22-25h of the first test  
116 being conducted. Samples were stored refrigerated at 2-6°C between  
117 tests.

### 118 *Comparison of saliva and nasopharyngeal/oropharyngeal samples*

119 Between May 13 and September 21, 2020, 431 tests on saliva samples  
120 were performed, and the results were compared with paired NPS RT-  
121 PCR test results. Using NPS RT-PCR as the reference, there were

122 104 PCR positive samples and 327 negative patients, including  
123 125 pediatric (age 5-17 years (average 11.3 years)) samples. The  
124 observed RT-PCR positive results were divided into groups according  
125 to the number of days after the onset of symptoms: 0-14 days (22  
126 patients); 15-30 days (52 patients); 31-70 days (20 patients) and  
127 10 asymptomatic patients. The results of the comparison of the  
128 mentioned subgroups are presented in Table 4.

129 Sensitivity and specificity for the respective groups were: for 0-14  
130 days 90% (95%CI 68.3%-98.7%) and 100% (95%CI 22.4%-100%);  
131 for 15-30 days 64.7% (95% CI 46.5%-80.3%) and 83.3% (95%CI  
132 58.9%-96.4%); for 31-70 days 71.4% (95%CI 29.0%-96.3%) and  
133 84.6% (95%CI 54.6%-98.1%); for asymptomatic 71.4% (95%CI  
134 29.0%-96.3%) and 66.7% (95%CI 0.8%-90.6%). The mean Ct values  
135 for the groups were 33.9 for NPS and 33.8 for saliva (0-14 days), 34.8  
136 for NPS and 34 for saliva (15-30 days), and 36.5 for NPS and 39 for  
137 saliva in the asymptomatic patient group.

### 138 ***Pooling of saliva***

139 To evaluate the testing of pooled saliva samples, 37 pools were  
140 constituted. There were 15 pools of 5 samples (4 negatives + 1  
141 positive), 13 pools of 10 samples (9 negatives + 1 positive), and  
142 9 pools of 20 samples (19 negatives + 1 positive). The RT-PCR testing  
143 for each pool was repeated twice. The total number of measurements  
144 was 74. All results were 100% positive.

145 When using pooling, the number of tests needed per sample was  
146 calculated as follows: the total number of tests needed to test all  
147 samples is divided by the total number of samples. For example, if

148 500 samples are being tested in pools of 10, it means 50 tests are  
149 initially needed. With a positivity rate of 1%, a maximum of five pools  
150 will contain a positive specimen (if each positive sample is in a  
151 different pool). The 50 samples from these five pools will have to be  
152 retested individually (each of the five positive pools contains 10  
153 samples). Therefore, a total of 100 tests are needed to evaluate all  
154 500 samples and the number of tests per sample is  $100/500 = 0.2$ .

155 The positivity rate in Latvia on September 23, 2020, was 0.5%.

156 The approximate positivity rate at which the pooling of 5 samples  
157 becomes more efficient than the pooling of 10 samples is 3% (2-4%  
158 depending on test price, laboratory load, tests per sample).

### 159 *Field study*

160 To evaluate the convenience of saliva pool testing by RT-PCR in field  
161 conditions, the town of Kuldīga (total population 10,352) with an  
162 ongoing outbreak of COVID-19 in a textile factory was selected. In  
163 collaboration with local authorities, 4,100 saliva self-sampling kits  
164 were distributed to inhabitants at a specially established distribution  
165 point. There were four persons dedicated to the distribution of the kits  
166 and four drivers to deliver the samples by car to the testing laboratory  
167 in Riga (150 km one way). During the study period, 3,660 saliva  
168 samples were collected (response rate 91.5%), delivered to the  
169 laboratory, and tested in pools of 10 samples. There were a total of  
170 366 pools. In the first round of testing 43 pools were found to be  
171 positive and samples from these pools were re-tested individually. The  
172 saliva samples from 44 patients were confirmed as positive by RT-  
173 PCR. Mean Ct values of pooled samples were 13% higher than

174 individually tested Ct (31.6 versus 27.6). The positivity rate of the  
175 tested population was 1.2%. In total 796 RT-PCR tests were  
176 performed. At the time of the sample collection, 68.2% (30/44) of  
177 patients did not report any symptoms on the questionnaire form.

178 Nasopharyngeal swab tests and saliva tests were compared with the  
179 number of new COVID-19 cases. The findings illustrate that the  
180 second peak in new cases occurred 6-7 days after the initial peak. Such  
181 findings correspond with the mean incubation period of the SARS-  
182 CoV-2. The results reflect a decrease in new cases in the following  
183 observation period (Figure 1).

184

## 185 **Discussion**

186 The findings of our study can be summarized as follows: (a) for the  
187 detection of SARS-CoV-2, saliva is a stable specimen with acceptable  
188 specificity and sensitivity at the early stages of infection; (b) saliva  
189 specimen is appropriate for pooling, with accurate diagnostic  
190 performance.

191 Saliva has been identified as a reliable testing specimen for SARS-  
192 CoV-2 using the RT-PCR approach in several recent studies (7–9). In  
193 the updated European Centre for Disease Prevention and Control  
194 (ECDC) recommendations, saliva is also mentioned as a convenient  
195 specimen for SARS-CoV-2 testing (10,11). The FDA has approved  
196 methods for SARS-CoV-2 testing using saliva in several laboratories  
197 (12,13). Nevertheless, saliva has been included in IFCC COVID-19  
198 Guidelines on Molecular, Serological, and  
199 Biochemical/Haematological Testing as a promising sample type (14).



200 The high expression of ACE2 receptors in salivary gland cells is the  
201 main factor for virus affinity that could lead to active replication and  
202 transmission by saliva droplets expelled into the air during coughing  
203 or sneezing (15,16).

204 It is essential to establish standardized sample collection procedures,  
205 safe logistics, and reliable testing methods that meet performance  
206 requirements. Our stability testing confirmed that saliva samples  
207 stayed equally positive up to 24h.

208 In the analytical context, saliva can have the same or even better  
209 performance than NPS (17). It has been previously confirmed to be  
210 highly sensitive and specific at the early stage of infection 0-14 days  
211 after onset of symptoms and in asymptomatic cases (17,18). Therefore,  
212 it is essential to take into consideration the relationship between the  
213 dynamics of viral load, Ct values, and the number of days after the  
214 onset of symptoms. As described in prior publications, the Ct value is  
215 important in determining the infectiousness of a patient sample. Ct  
216 values above 34 do not emit infectious virus particles, and values  
217 between 27-34 show low viability of the viral load. Samples with a Ct  
218 value of 13-17 show positive virus viability (19). Ct values may vary  
219 depending on the different assays by up to 5 cycles for the same sample  
220 (20). Variation also appears due to the quality of the specimen obtained  
221 and the different treatment methods used to prepare samples for testing  
222 (21). As expected, we got some variation between the NPS and saliva  
223 sample types. In our pilot testing using 44 positive saliva samples we  
224 found slightly higher (13%) Ct values in pools, compared to individual  
225 tests. Similar findings have been published by other researchers (22).  
226 This observed slight difference still allows for the safe use of saliva

227 pooling for surveillance purposes with sufficient diagnostic accuracy.  
228 Nevertheless, pooling strategies are described in the latest update of  
229 COVID-19 testing strategies and objectives published by the ECDC  
230 (11). There is evidence of benefits from pooling in low prevalence  
231 countries with a low proportion of positive samples – up to 5%. Recent  
232 publications indicate that for populations with a prevalence of less than  
233 1% the testing of saliva pools of 10 or 20 samples is more beneficial,  
234 and our independent calculations also bear this out. Comparing the  
235 correlation between different pool sizes (usefulness and efficiency)  
236 with test positivity rate, we concluded that a pool size of 10 is more  
237 efficient than a pool size of 5. The calculations are based on test price,  
238 reimbursement conditions, and the number of tests per sample (when  
239 using a pooling strategy) (23,24).

240 The pooling strategy for self-collected saliva samples is the optimal  
241 solution that saves resources and reduces the testing time (25). In our  
242 real-life field test on a “perifocal” population, we successfully tested  
243 nearly a third of the citizens of the town of Kuldiga in three days. This  
244 allowed for fast identification of asymptomatic SARS-CoV-2 cases  
245 and those with mild symptoms to enable timely contact tracing and  
246 outbreak containment. The use of nasopharyngeal swabs in such a  
247 situation would have required more staff and time with possible patient  
248 compliance issues.

249 Additionally, improvements may reasonably be expected in terms of  
250 organizing the distribution of self-sampling kits to patients as well as  
251 the logistics of returning the kits to the laboratory that would further  
252 increase the usefulness of screening using a pooled testing strategy.

253 There were some limitations in our study: the size of the cohort of  
254 participants was limited, the selected laboratory-developed RT-PCR  
255 method for evaluation was used, also a lack of multicenter observation.  
256 Future studies extending the cohort are needed to confirm current  
257 findings and provide the implications in clinical practice.

258

## 259 **Conclusions**

260 Our findings confirm the stability of SARS-CoV-2 RNA in saliva,  
261 showing acceptable performance in terms of specificity and sensitivity  
262 at the early stages of infection, and the advantages of testing using a  
263 pooling strategy in a low prevalence population. Ct values and  
264 detected/missing gene information are favorable for the interpretation  
265 of the results from several aspects, e.g. epidemiological investigation,  
266 determination if the patient is infectious at the current stage, etc. Self-  
267 sampling makes the procedure faster, safer, and requires fewer  
268 resources. The targeted distribution of test kits among a population  
269 with a known outbreak significantly increased the positivity rate.  
270 Saliva pool testing on a large scale provides an additional tool to take  
271 timely measures and contain outbreaks.

272

## 273 **Ethical aspects**

274 The study was approved by the Ethics Committee of the Pauls Stradins  
275 Clinical University Hospital (record No 300720-18L).

276

## 277 **Acknowledgments**

278 We gratefully acknowledge all participants for their commitment to  
279 participate and their time. Special thanks to all trial team members in  
280 the E.Gulbja Laboratory for their dedication and work which made this  
281 study possible and Dr. A.Gramatniece for editorial help.

282

### 283 **Author contributions**

284 Gavars D - the conception and design of the study, Gavars M,  
285 Perminovs D, and Metla Z – validation of the method and  
286 interpretation of the data, Stasulans J, Stana J - patient recruitment and  
287 data collection, drafting of the article, Tauckels E - data analysis,  
288 Gulbis E, and Dumpis U – revising the article critically, final approval  
289 of the version to be submitted.

290

### 291 **Transparency declaration**

292 All authors declare that there are no conflicts of interest.

293

### 294 **Funding institution:**

295 Ministry of Education and Science, Republic of Latvia. Funding  
296 number: VPP-COVID-2020/1-0008.

297 Additional funding was provided by E.Gulbja laboratory.

298

### 299 **References:**

300 1. Rapid Risk Assessment: Coronavirus disease 2019 (COVID-19)  
301 in the EU/EEA and the UK– ninth update [Internet]. European

- 302 Centre for Disease Prevention and Control. 2020 [cited 2020 Nov  
303 16]. Available from: [https://www.ecdc.europa.eu/en/publications-](https://www.ecdc.europa.eu/en/publications-data/rapid-risk-assessment-coronavirus-disease-2019-covid-19-pandemic-ninth-update)  
304 [data/rapid-risk-assessment-coronavirus-disease-2019-covid-19-](https://www.ecdc.europa.eu/en/publications-data/rapid-risk-assessment-coronavirus-disease-2019-covid-19-pandemic-ninth-update)  
305 [pandemic-ninth-update](https://www.ecdc.europa.eu/en/publications-data/rapid-risk-assessment-coronavirus-disease-2019-covid-19-pandemic-ninth-update)
- 306 2. Laboratory testing for 2019 novel coronavirus (2019-nCoV) in  
307 suspected human cases [Internet]. [cited 2020 Nov 16]. Available  
308 from: [https://www.who.int/publications-detail-redirect/10665-](https://www.who.int/publications-detail-redirect/10665-331501)  
309 [331501](https://www.who.int/publications-detail-redirect/10665-331501)
- 310 3. COVID-19: Overcoming supply shortages for diagnostic testing |  
311 McKinsey [Internet]. [cited 2020 Nov 16]. Available from:  
312 [https://www.mckinsey.com/industries/pharmaceuticals-and-](https://www.mckinsey.com/industries/pharmaceuticals-and-medical-products/our-insights/covid-19-overcoming-supply-shortages-for-diagnostic-testing#)  
313 [medical-products/our-insights/covid-19-overcoming-supply-](https://www.mckinsey.com/industries/pharmaceuticals-and-medical-products/our-insights/covid-19-overcoming-supply-shortages-for-diagnostic-testing#)  
314 [shortages-for-diagnostic-testing#](https://www.mckinsey.com/industries/pharmaceuticals-and-medical-products/our-insights/covid-19-overcoming-supply-shortages-for-diagnostic-testing#)
- 315 4. Jeong HW, Kim S-M, Kim H-S, Kim Y-I, Kim JH, Cho JY, et al.  
316 Viable SARS-CoV-2 in various specimens from COVID-19  
317 patients. *Clin Microbiol Infect*. 2020 Nov;26(11):1520–4.
- 318 5. COVID-19 situation update for the EU/EEA and the UK, as of 16  
319 November 2020 [Internet]. European Centre for Disease  
320 Prevention and Control. [cited 2020 Nov 16]. Available from:  
321 <https://www.ecdc.europa.eu/en/cases-2019-ncov-eueea>
- 322 6. Marty FM, Chen K, Verrill KA. How to Obtain a Nasopharyngeal  
323 Swab Specimen. *N Engl J Med*. 2020 May 28;382(22):e76.
- 324 7. Fakheran O, Dehghannejad M, Khademi A. Saliva as a diagnostic  
325 specimen for detection of SARS-CoV-2 in suspected patients: a  
326 scoping review. *Infect Dis Poverty*. 2020 Jul 22;9(1):100.
- 327 8. Hamid H, Khurshid Z, Adanir N, Zafar MS, Zohaib S. COVID-19  
328 Pandemic and Role of Human Saliva as a Testing Biofluid in  
329 Point-of-Care Technology. *Eur J Dent* [Internet]. 2020 Jun 3 [cited

- 330 2020 Nov 16]; Available from: [http://www.thieme-](http://www.thieme-connect.de/DOI/DOI?10.1055/s-0040-1713020)  
331 [connect.de/DOI/DOI?10.1055/s-0040-1713020](http://www.thieme-connect.de/DOI/DOI?10.1055/s-0040-1713020)
- 332 9. Czumbel LM, Kiss S, Farkas N, Mandel I, Hegyi A, Nagy Á, et  
333 al. Saliva as a Candidate for COVID-19 Diagnostic Testing: A  
334 Meta-Analysis. *Front Med.* 2020 Aug 4;7:465–465.
- 335 10. Objectives for COVID-19 testing in school settings - first update,  
336 21 August 2020. Tech Rep. 2020;4.
- 337 11. COVID-19 testing strategies and objectives [Internet]. European  
338 Centre for Disease Prevention and Control. 2020 [cited 2020 Nov  
339 16]. Available from: [https://www.ecdc.europa.eu/en/publications-](https://www.ecdc.europa.eu/en/publications-data/covid-19-testing-strategies-and-objectives)  
340 [data/covid-19-testing-strategies-and-objectives](https://www.ecdc.europa.eu/en/publications-data/covid-19-testing-strategies-and-objectives)
- 341 12. Commissioner O of the. Coronavirus (COVID-19) Update: FDA  
342 Authorizes First Diagnostic Test Using At-Home Collection of  
343 Saliva Specimens [Internet]. FDA. FDA; 2020 [cited 2020 Nov  
344 16]. Available from: [https://www.fda.gov/news-events/press-](https://www.fda.gov/news-events/press-announcements/coronavirus-covid-19-update-fda-authorizes-first-diagnostic-test-using-home-collection-saliva)  
345 [announcements/coronavirus-covid-19-update-fda-authorizes-](https://www.fda.gov/news-events/press-announcements/coronavirus-covid-19-update-fda-authorizes-first-diagnostic-test-using-home-collection-saliva)  
346 [first-diagnostic-test-using-home-collection-saliva](https://www.fda.gov/news-events/press-announcements/coronavirus-covid-19-update-fda-authorizes-first-diagnostic-test-using-home-collection-saliva)
- 347 13. Rutgers Launches Genetic Testing Service for New Coronavirus |  
348 Rutgers University [Internet]. [cited 2020 Nov 16]. Available  
349 from: [https://www.rutgers.edu/news/rutgers-launches-genetic-](https://www.rutgers.edu/news/rutgers-launches-genetic-testing-service-new-coronavirus)  
350 [testing-service-new-coronavirus](https://www.rutgers.edu/news/rutgers-launches-genetic-testing-service-new-coronavirus)
- 351 14. Bohn M, Mancini N, Loh P, Wang C-B, Grimm M, Gramegna  
352 M, et al. IFCC interim guidelines on molecular testing of SARS-  
353 CoV-2 infection. *Clin Chem Lab Med.* 2020 Oct 7;
- 354 15. Liu L, Wei Q, Alvarez X, Wang H, Du Y, Zhu H, et al. Epithelial  
355 Cells Lining Salivary Gland Ducts Are Early Target Cells of  
356 Severe Acute Respiratory Syndrome Coronavirus Infection in the

- 357 Upper Respiratory Tracts of Rhesus Macaques. *J Virol*. 2011 Apr  
358 15;85(8):4025–30.
- 359 16. Xu J, Li Y, Gan F, Du Y, Yao Y. Salivary Glands: Potential  
360 Reservoirs for COVID-19 Asymptomatic Infection. *J Dent Res*.  
361 2020;99(8):989.
- 362 17. Wyllie AL, Fournier J, Casanovas-Massana A, Campbell M,  
363 Tokuyama M, Vijayakumar P, et al. Saliva or Nasopharyngeal  
364 Swab Specimens for Detection of SARS-CoV-2. *N Engl J Med*.  
365 2020;4.
- 366 18. Zhang W, Du R-H, Li B, Zheng X-S, Yang X-L, Hu B, et al.  
367 Molecular and serological investigation of 2019-nCoV infected  
368 patients: implication of multiple shedding routes. *Emerg Microbes*  
369 *Infect*. 2020 Feb 17;9(1):386–9.
- 370 19. La Scola B, Le Bideau M, Andreani J, Hoang VT, Grimaldier C,  
371 Colson P, et al. Viral RNA load as determined by cell culture as a  
372 management tool for discharge of SARS-CoV-2 patients from  
373 infectious disease wards. *Eur J Clin Microbiol Infect Dis*. 2020  
374 Apr 27;1–3.
- 375 20. Nalla AK, Casto AM, Huang M-LW, Perchetti GA, Sampoleo R,  
376 Shrestha L, et al. Comparative Performance of SARS-CoV-2  
377 Detection Assays Using Seven Different Primer-Probe Sets and  
378 One Assay Kit. *J Clin Microbiol*. 2020 26;58(6).
- 379 21. Rodino KG, Espy MJ, Buckwalter SP, Walchak RC, Germer JJ,  
380 Fernholz E, et al. Evaluation of Saline, Phosphate-Buffered  
381 Saline, and Minimum Essential Medium as Potential Alternatives  
382 to Viral Transport Media for SARS-CoV-2 Testing. McAdam AJ,  
383 editor. *J Clin Microbiol*. 2020 May 26;58(6):e00590-20.

- 384 22. Lohse S, Pfuhl T, Berkó-Göttel B, Rissland J, Geißler T, Gärtner  
385 B, et al. Pooling of samples for testing for SARS-CoV-2 in  
386 asymptomatic people. *Lancet Infect Dis.* 2020 Nov  
387 1;20(11):1231–2.
- 388 23. Regen F, Eren N, Heuser I, Hellmann-Regen J. A simple approach  
389 to optimum pool size for pooled SARS-CoV-2 testing. *Int J Infect*  
390 *Dis.* 2020 Nov 1;100:324–6.
- 391 24. Mutesa L, Ndishimye P, Butera Y, Souopgui J, Uwineza A,  
392 Rutayisire R, et al. A pooled testing strategy for identifying  
393 SARS-CoV-2 at low prevalence. *Nature.* 2020 Oct 21;1–8.
- 394 25. Fogarty A, Joseph A, Shaw D. Pooled saliva samples for COVID-  
395 19 surveillance programme. *Lancet Respir Med.*  
396 2020;8(11):1078–80.
- 397



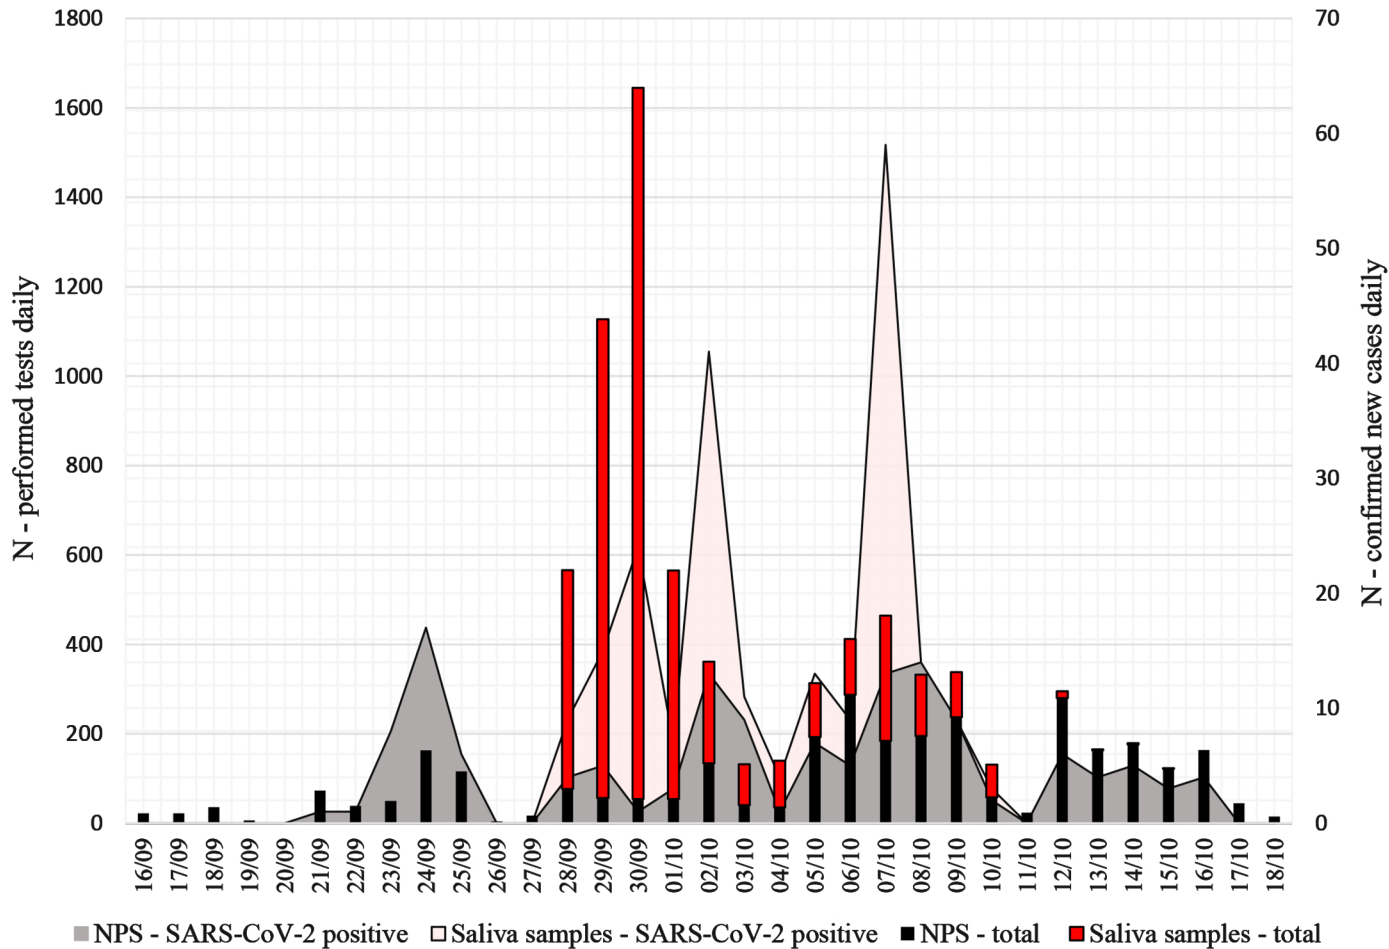

**Table 1 Run No. 1 on saliva stability measurements of 5 samples collected 2-4h before the first testing**

|   | <b>0</b>         | <b>after 8h</b>  | <b>after 24h</b> | <b>after 25h</b> |
|---|------------------|------------------|------------------|------------------|
|   | <i>1st 14:00</i> | <i>2nd 22:00</i> | <i>3rd 14:00</i> | <i>4th 15:00</i> |
| 1 | Positive         | Positive         | Positive         | Positive         |
| 2 | Positive         | Positive         | Positive         | Positive         |
| 3 | Positive         | W- Positive      | Positive         | W- Positive      |
| 4 | Positive         | Positive         | Positive         | No sample left   |
| 5 | Positive         | W- Positive      | Positive         | W- Positive      |

Abbreviations: W-Positive - weak positive result, h - hours

**Table 2 Run No. 2 on saliva stability serial measurements of two samples collected 2-4h before first testing**

|    | <b>0</b>         | <b>after 12h</b> | <b>after 22h</b> | <b>after 22h rep.</b> |
|----|------------------|------------------|------------------|-----------------------|
|    | <i>1st 12:00</i> | <i>2nd 00:00</i> | <i>3rd 10:00</i> | <i>4th 10:00</i>      |
| 6  | W- Positive      | Positive         | Positive         | Positive              |
| Ct | 35               | 36               | 37               | 37                    |
| 7  | Positive         | Positive         | Positive         | Positive              |
| Ct | 32               | 33               | 30               | 31                    |

Abbreviations: W-Positive - weak positive result, rep. - repeats, h – hours

**Table 3 Run No. 3 on saliva repeatability measurements of one sample collected 2 - 4h before the first testing with indicated Ct values**

|        | <b>0</b>         | <b>after 3h</b>  | <b>after 12h</b> | <b>after 24h</b> |
|--------|------------------|------------------|------------------|------------------|
|        | <i>1st 11:00</i> | <i>2nd 14:00</i> | <i>3rd 02:00</i> | <i>4th 11:00</i> |
| 8      | Positive         | Positive         | Positive         | Positive         |
| Ct     | 34               | 30               | 33               | 35               |
| 8 rep. | Positive         | Positive         | Positive         | Positive         |
| Ct     | 34               | 27               | 31               | 35               |

Abbreviations: rep. - repeats, h – hours

**Table 4 Saliva samples compared to the results of nasopharyngeal/ oropharyngeal swabs**

| Days after the start of symptoms |          | NPS      |          |          |          |          |          |              |          |
|----------------------------------|----------|----------|----------|----------|----------|----------|----------|--------------|----------|
|                                  |          | 0-14     |          | 15-30    |          | 31-70    |          | Asymptomatic |          |
| RT-PCR                           |          | Positive | Negative | Positive | Negative | Positive | Negative | Positive     | Negative |
| Saliva                           | Positive | 18       | 0        | 22       | 3        | 5        | 2        | 5            | 1        |
|                                  | Negative | 2        | 2        | 12       | 15       | 2        | 11       | 2            | 2        |
| Sensitivity %                    |          | 90       |          | 64.7     |          | 71.4     |          | 71.4         |          |
| Specificity %                    |          | 100      |          | 83.3     |          | 84.6     |          | 66.7         |          |

Abbreviations: NPS - nasopharyngeal/ oropharyngeal swabs, RT-PCR – real-time polymerase chain reaction
